# Supplementary material
Source: MDPI journal article supplement (https://www.mdpi.com/2304-6740/11/5/223)
Supplement: s1 [file s1]

## Electronic Supplementary Information

### **DFT analysis of the electronic and structural properties of lanthanide nitride cluster fullerenes $\text{Ln}_3\text{N@C}_{80}$**

César Martínez-Flores and Vladimir A. Basiuk\*

*Instituto de Ciencias Nucleares, Universidad Nacional Autónoma de México, Circuito  
Exterior C.U., Ciudad de México, 04510, México*

---

\* Corresponding author

E-mail: [cesar.flores@correo.nucleares.unam.mx](mailto:cesar.flores@correo.nucleares.unam.mx) (C. Martinez-Flores),  
[basiuk@nucleares.unam.mx](mailto:basiuk@nucleares.unam.mx) (V.A. Basiuk)

ORCID:

C. Martínez-Flores: 0000-0002-9806-3207

V. A. Basiuk: 0000-0001-7864-9203

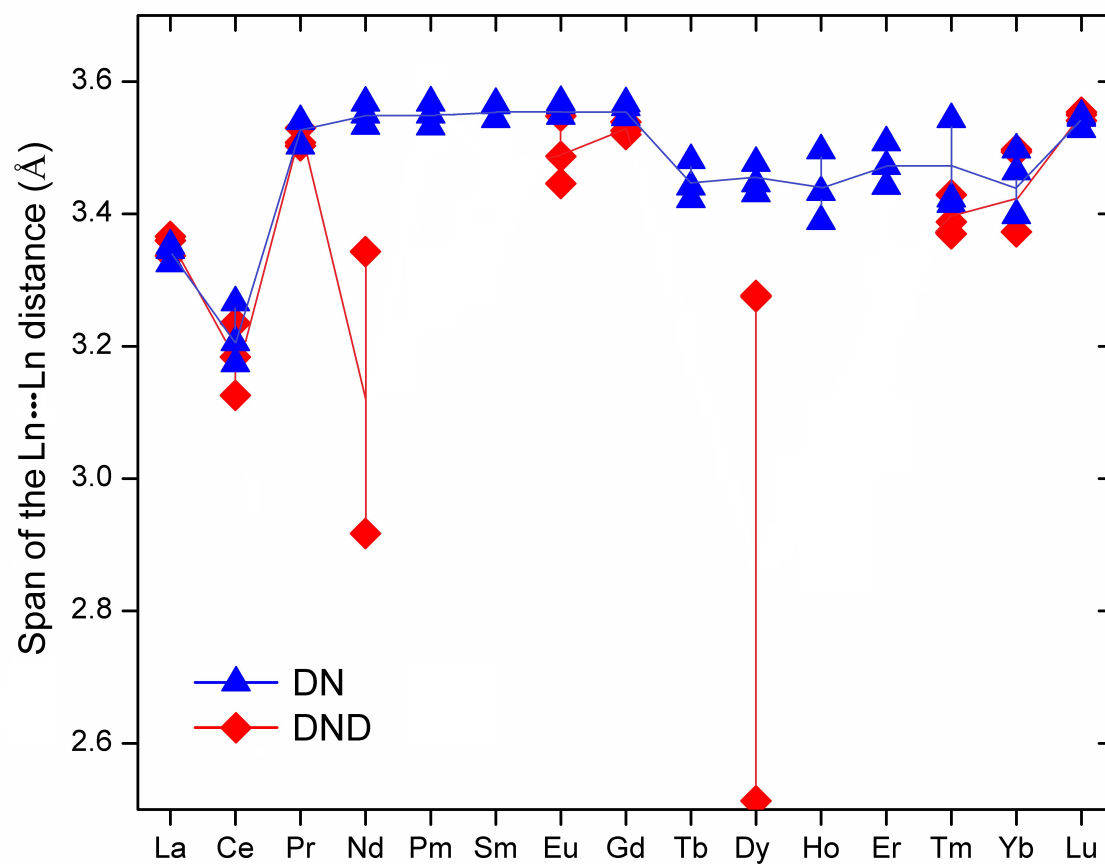

**Figure S1.** Comparison of the Ln...Ln distance (Å) in  $\text{Ln}_3\text{N}@\text{C}_{80}$  NCFs calculated by using DN and DND basis sets.

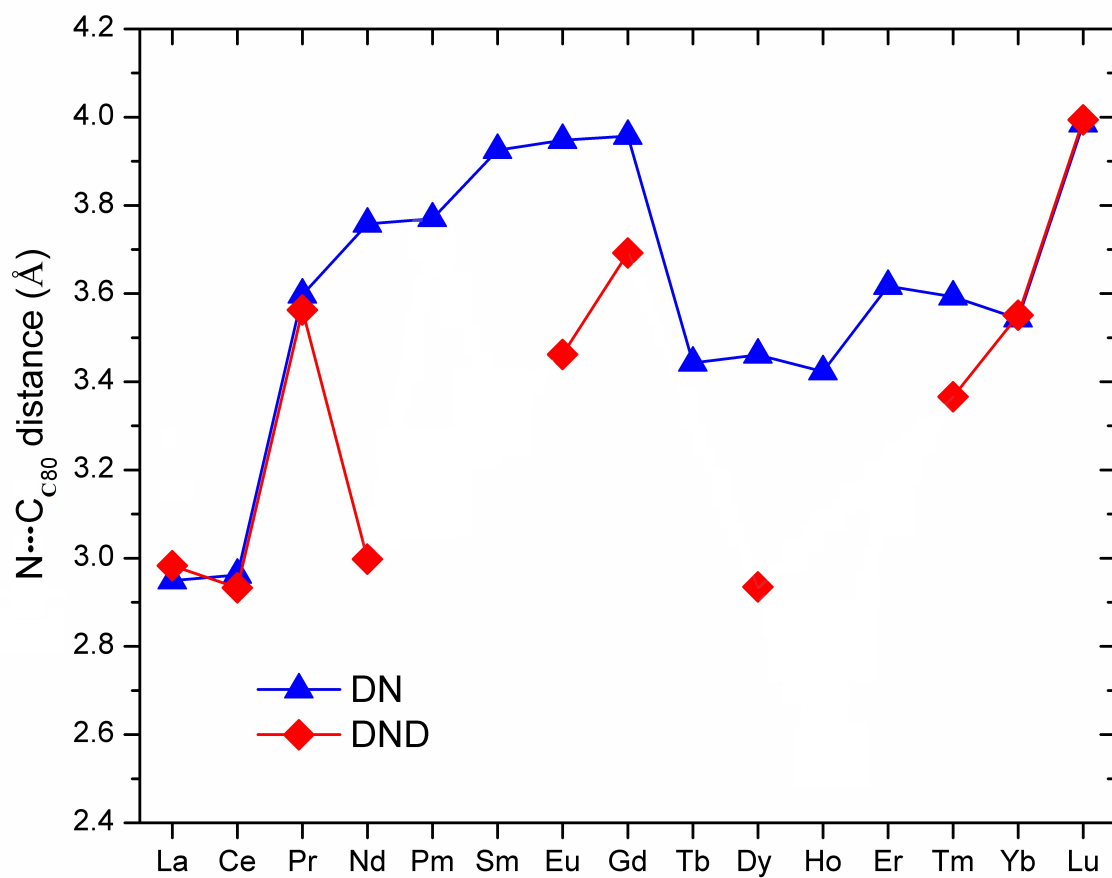

**Figure S2.** Comparison of the N...C<sub>80</sub> distance (Å) of the Ln<sub>3</sub>N@C<sub>80</sub> complexes calculated by using DN and DND basis sets.

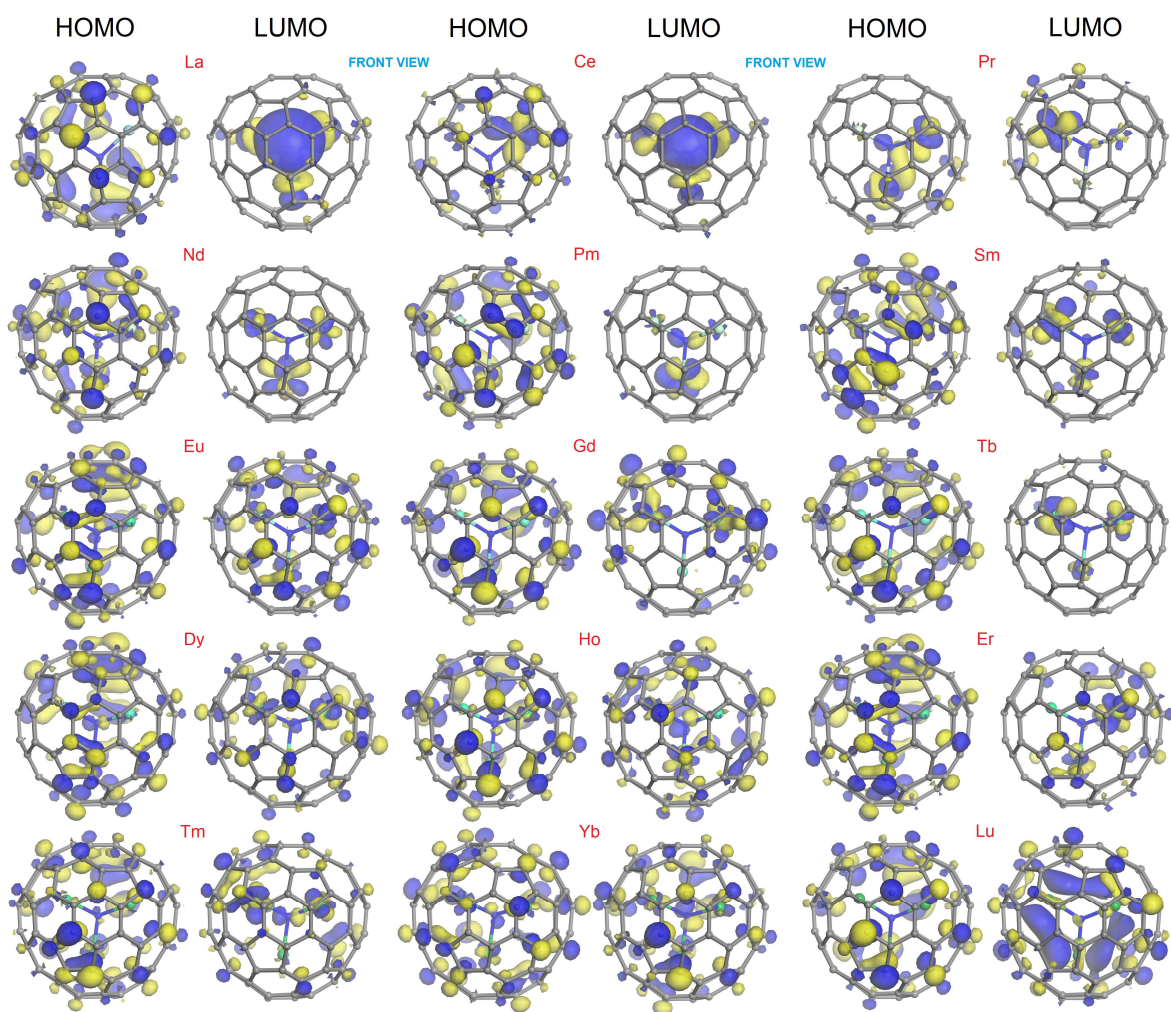

**Figure S3.** Complete patterns of HOMO-LUMO distribution (front views with isosurfaces at 0.03 a.u.) in  $\text{Ln}_3\text{N}@C_{80}$  NCFs calculated by using DN basis set.



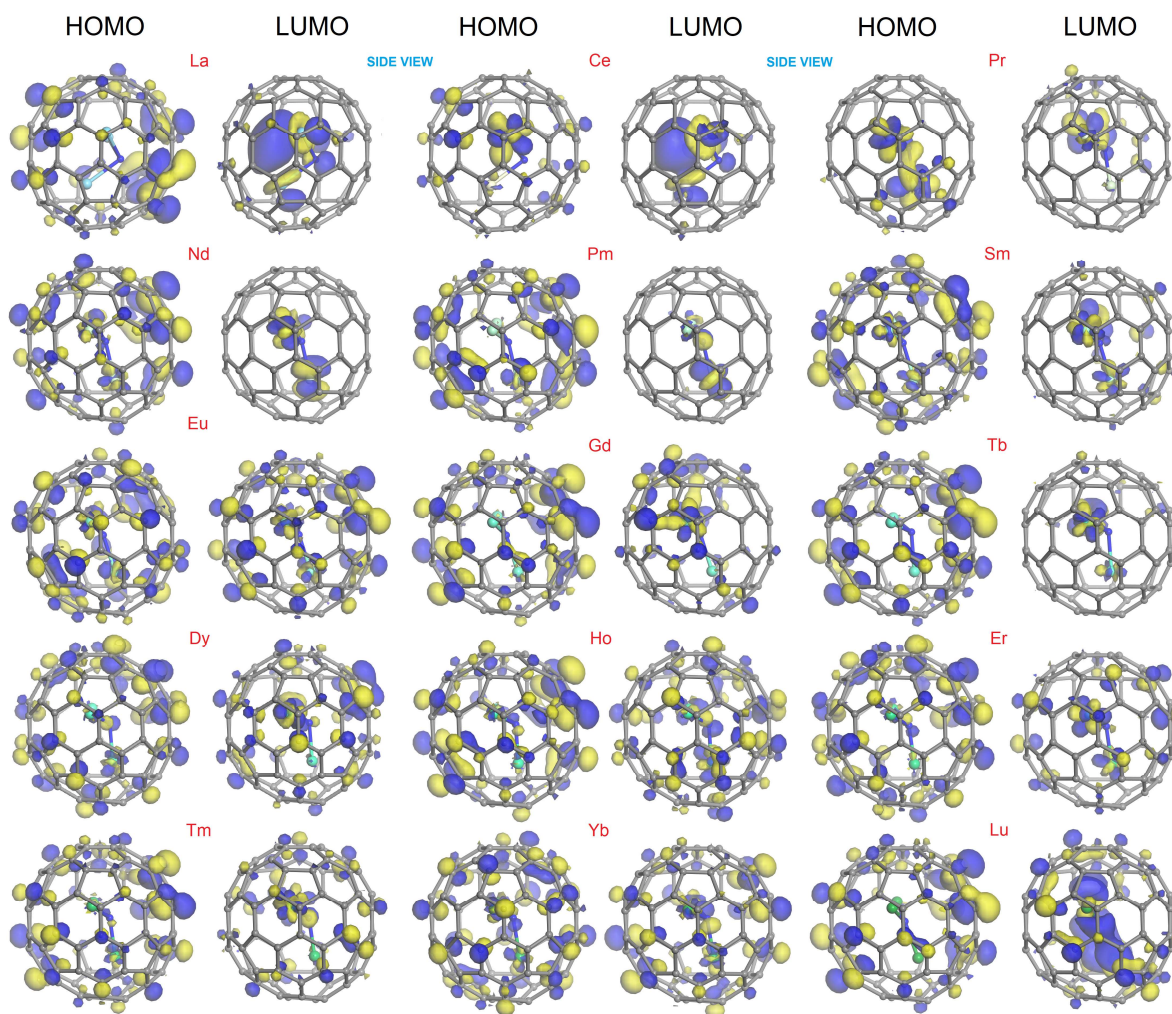

**Figure S4.** Complete patterns of HOMO-LUMO distribution (isosurfaces at 0.03 a.u.) in  $\text{Ln}_3\text{N}@C_{80}$  NCFs but rotated at an angle of  $90^\circ$  to the left (side view) with respect to **Figure S3**.

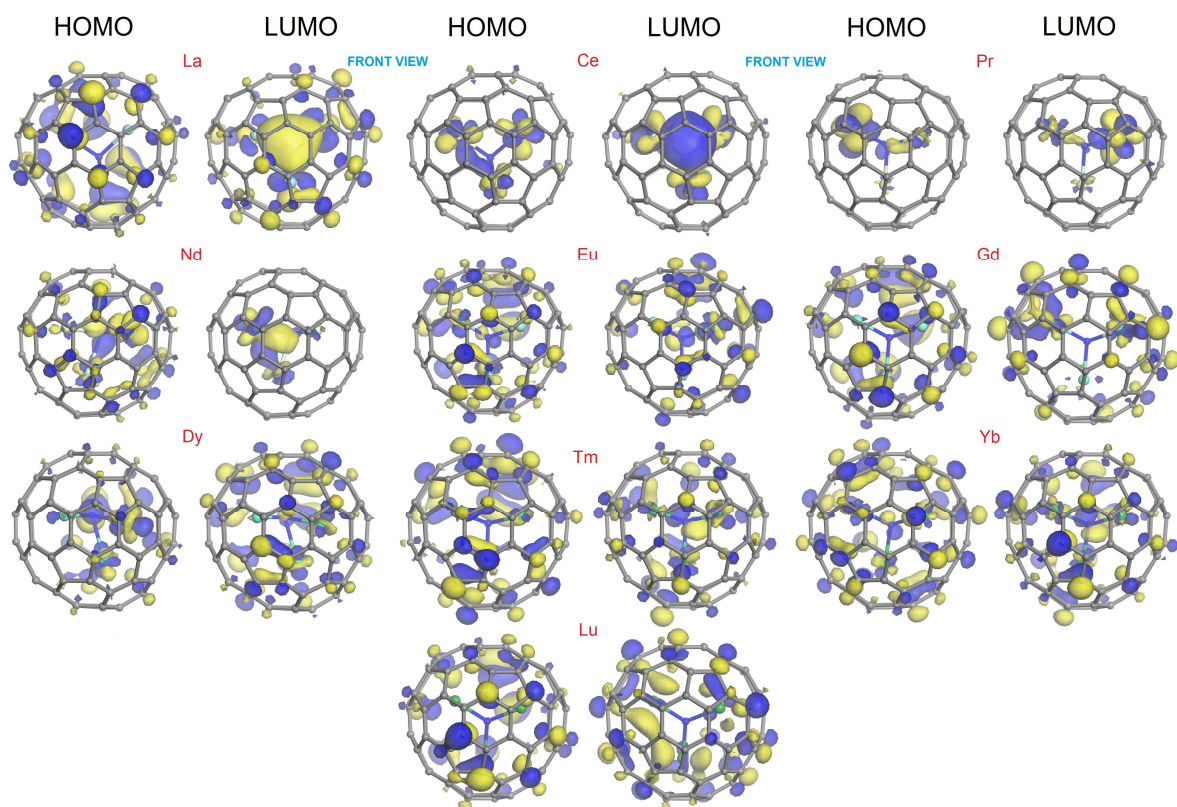

**Figure S5.** Patterns of HOMO-LUMO distribution (front views with isosurfaces at 0.03 a.u.) in  $\text{Ln}_3\text{N}@C_{80}$  NCFs calculated by using DND basis set.

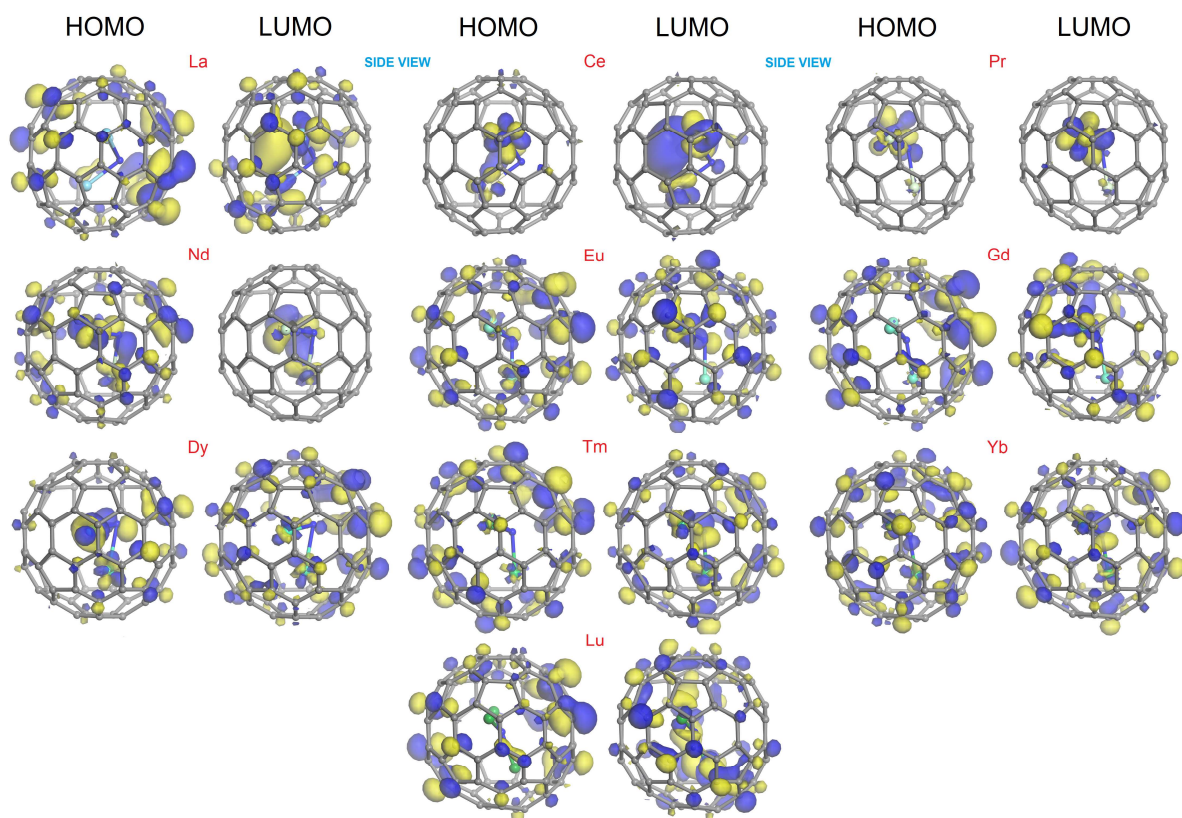

**Figure S6.** Patterns of HOMO-LUMO distribution (isosurfaces at 0.03 a.u.) in  $\text{Ln}_3\text{N}@C_{80}$  NCFs but rotated at an angle of  $90^\circ$  to the left (side views) with respect to **Figure S5**.



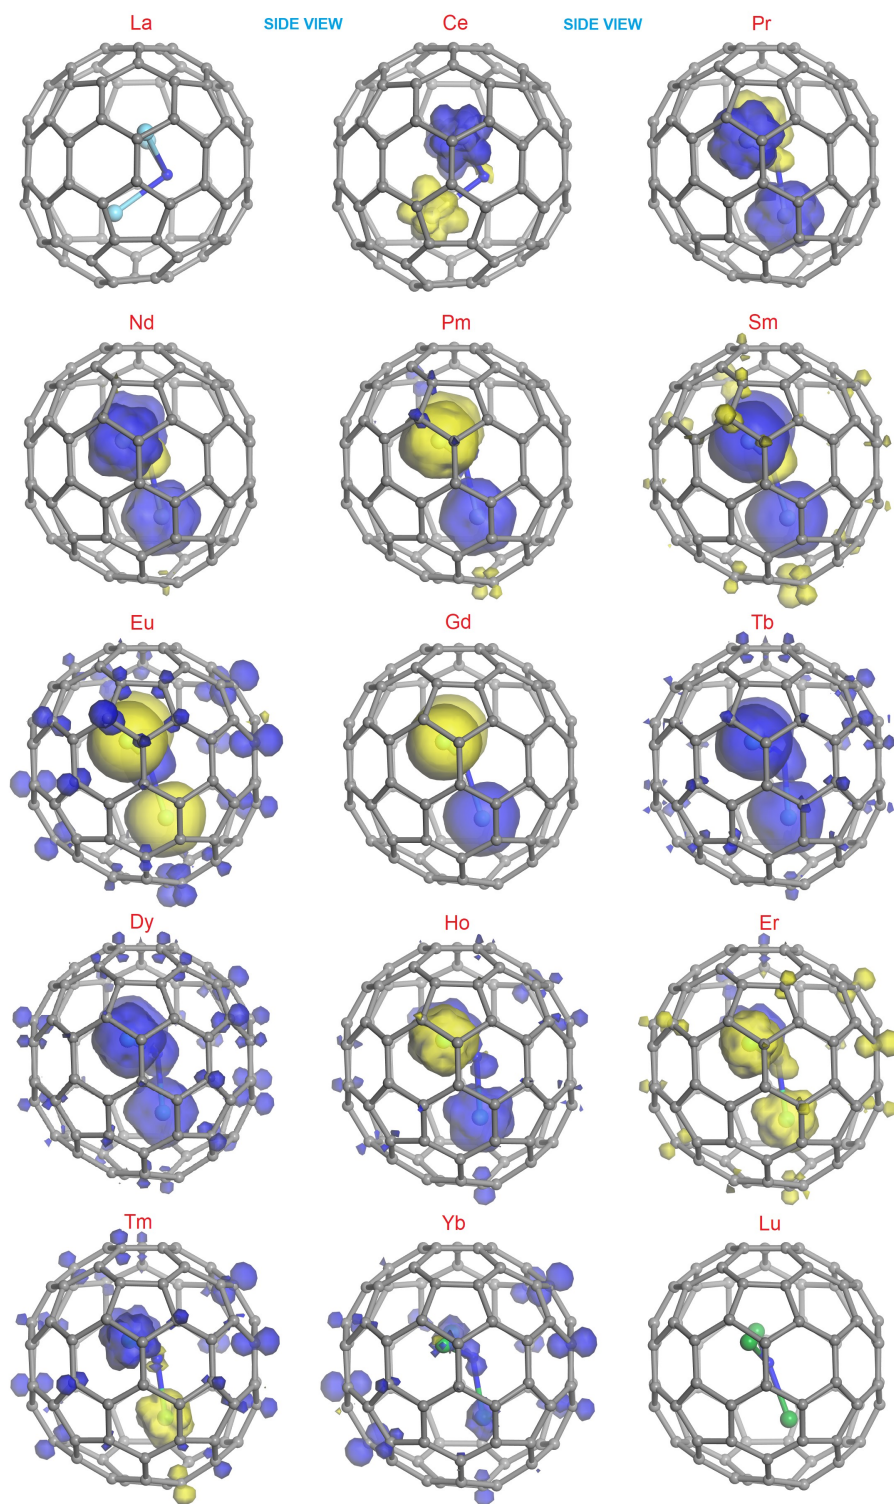

**Figure S7.** Spin density plots (isosurfaces at 0.02 a.u.) for  $\text{Ln}_3\text{N}@C_{80}$  NCFs calculated by using DN basis set but rotated an angle of  $90^\circ$  to the left (side views) with respect to **Figure 7**. Blue and yellow lobes correspond to spin-up and spin-down electrons, respectively.

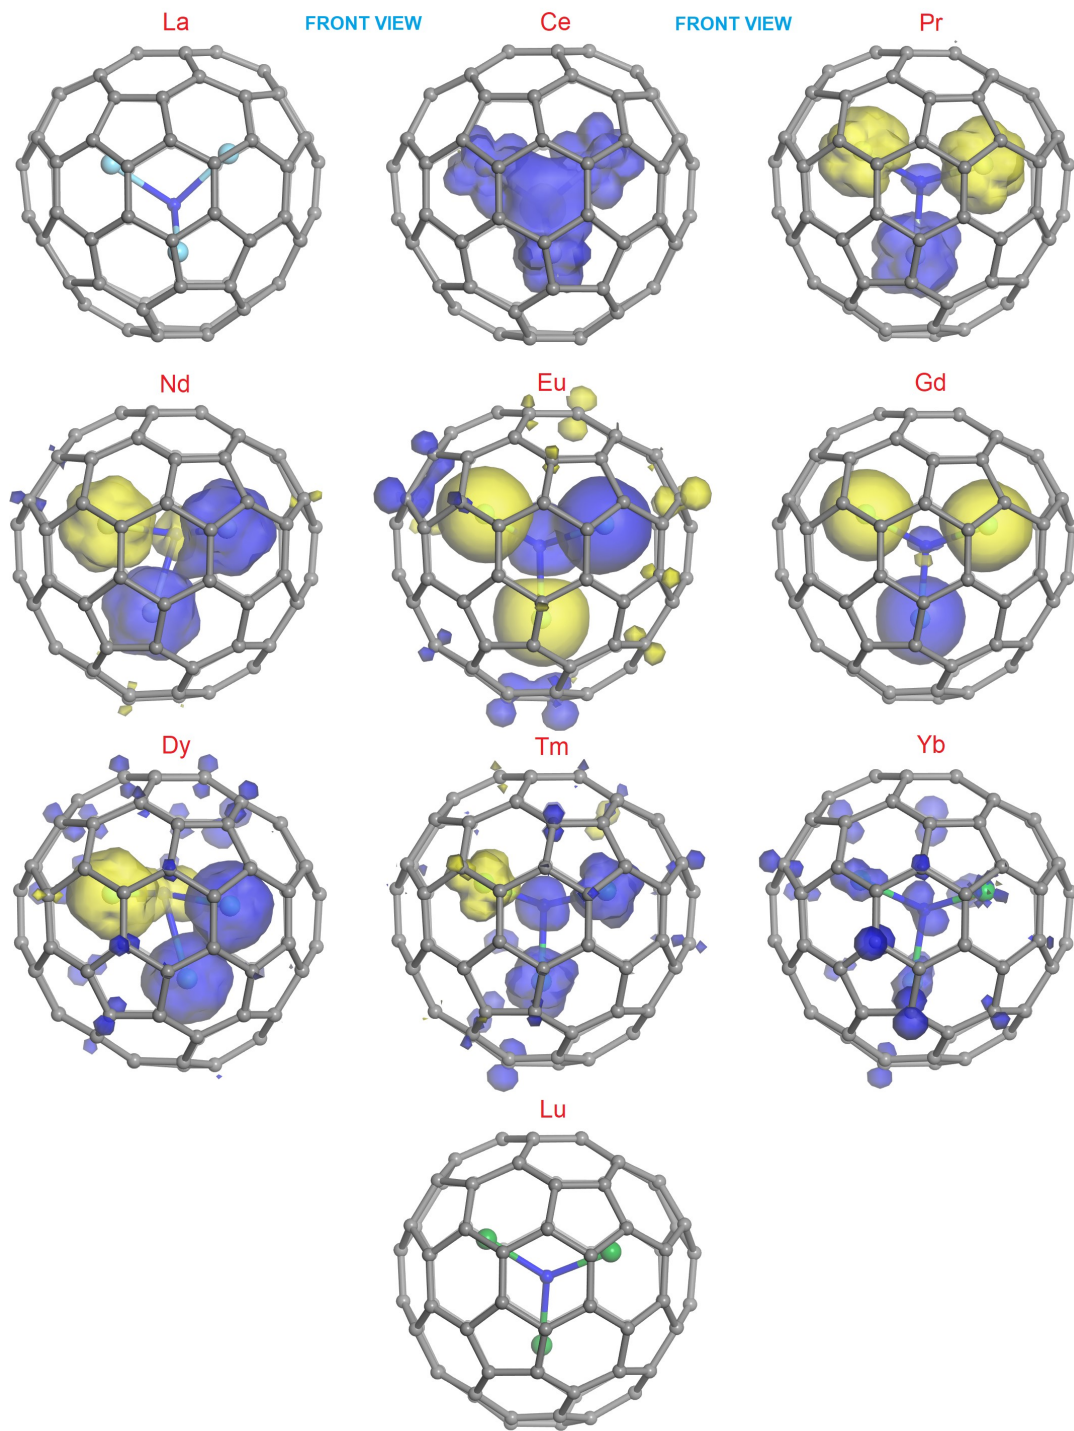

**Figure S8.** Spin density plots (isosurfaces at 0.02 a.u.) for  $\text{Ln}_3\text{N}@C_{80}$  NCFs were calculated by using DND basis. Blue and yellow lobes correspond to spin-up and spin-down electrons, respectively.

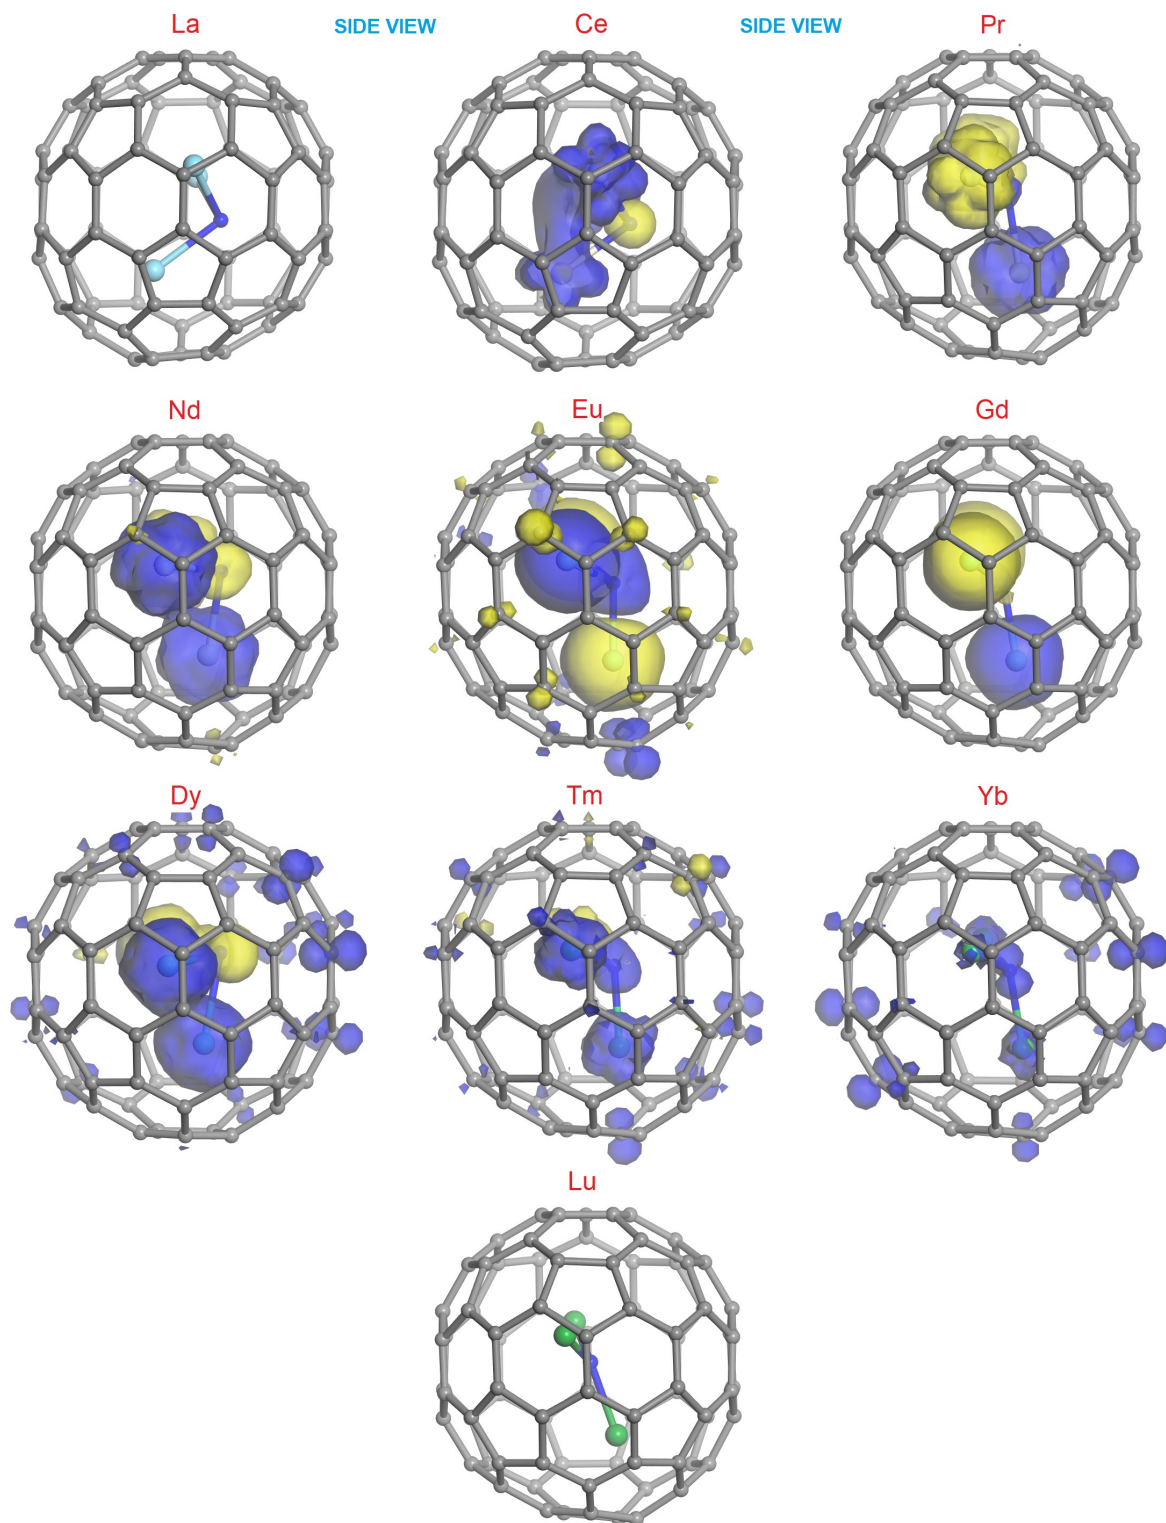

**Figure S9.** Spin density plots (isosurfaces at 0.02 a.u.) for  $\text{Ln}_3\text{N}@C_{80}$  NCFs calculated by using DND basis but rotated an angle of  $90^\circ$  to the left (side views) with respect to **Figure S8**.
